# Supplementary material
Source: PubMed Central journal article supplement (PMC6026272)
Supplement: mmc1.pdf [file mmc1.pdf]

## Pharmacotherapy for Non-Cystic Fibrosis Bronchiectasis

### Results From an NTM Info & Research Patient Survey and the Bronchiectasis and NTM Research Registry

*Emily Henkle, PhD, MPH; Timothy R. Aksamit, MD; Alan F. Barker, MD;  
Jeffrey R. Curtis, MD, MPH; Charles L. Daley, MD; M. Leigh Anne Daniels, MD, MPH;  
Angela DiMango, MD; Edward Eden, MD; Kevin Fennelly, MD; David E. Griffith, MD;  
Margaret Johnson, MD; Michael R. Knowles, MD; Amy Leitman, JD; Philip Leitman, MBA;  
Elisha Malanga, BS; Mark L. Metersky, MD; Peadar G. Noone, MD; Anne E. O'Donnell, MD;  
Kenneth N. Olivier, MD; Delia Prieto, MEd; Matthias Salathe, MD; Byron Thomashow, MD;  
Gregory Tino, MD; Gerard Turino, MD; Susan Wisclenny; and Kevin L. Winthrop, MD, MPH*

CHEST 2017; 152(6):1120-1127

## e-Appendix 1. NTMir survey therapy questions

- 1) Have you ever been treated with any of the following medications? Check all that apply
  - Inhaled tobramycin, or "Tobi®"
  - Cayston®
  - Colistin®
  - Azithromycin or Zithromax® for NTM treatment
  - Azithromycin or Zithromax® or Z-pak for other infections or prevention/prophylaxis
  - Erythromycin for other infections or prevention/prophylaxis
  - Oral steroids
  - Inhaled steroids combined with bronchodilators (Advair® and Symbicort®)
  - Inhaled steroids without bronchodilators (Flovent®, QVAR®, Pulmicort®, Asmanex®, Azmacort®, Beclovent® or other)
- 2) Are you currently being treated with any of the following medications? Check all that apply.
  - Inhaled tobramycin, or "Tobi®"
  - Inhaled steroids combined with bronchodilators
  - Inhaled steroids without bronchodilators
  - Azithromycin ("Zithromax®")
  - Erythromycin
- 3) If you have ever taken azithromycin, how long have you taken it? You can add all the time together for the total amount in your lifetime.
  - (N/A)
  - <4 weeks
  - 4 weeks-<1 year
  - 1 year or longer
- 4) If have ever taken inhaled steroids regularly (daily), how long have you taken them? You can add all the time together for the total amount in your lifetime.
  - (N/A)
  - <4 weeks
  - 4 weeks-<1 year
  - 1 year or longer
